# Supplementary material for: Travel distance, frequency of return and the spread of disease
Source: Research Square preprint supplement (doi:10.21203/rs.3.rs-2488728/v1), 2023-01-24
Supplement: Supplementary file 1 [file b9be6853a96256926bc0a708.pdf]

# Travel distance, frequency of return and the spread of disease

## Supplementary Material

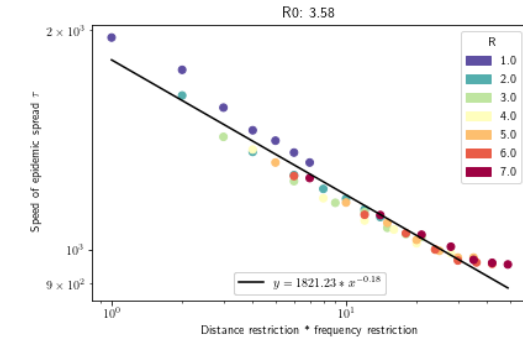

(a) NYC

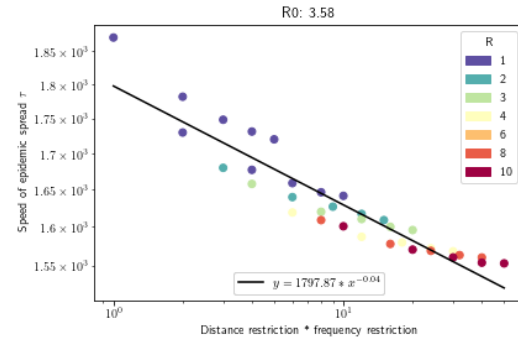

(b) Dakar

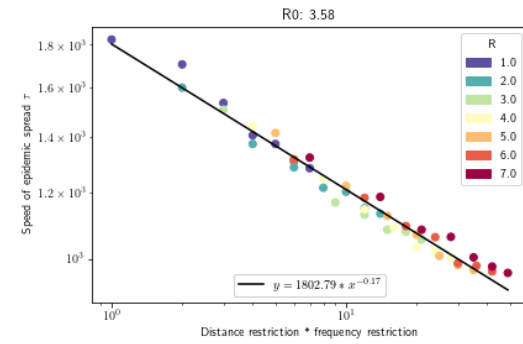

(c) NYC

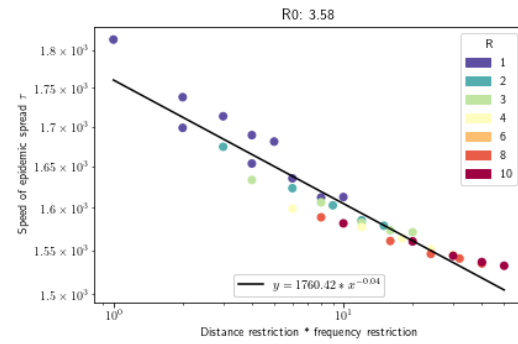

(d) Dakar

**Figure S1. Scaling collapse in SI and SIR model.** Top row: scaling collapse for SI model.  $R^2$  values for best-fit lines are, from left to right, .958 and .896. Best-fit line parameters are  $a = -0.18, b = 1821.23$  (NYC) and  $a = -0.04, b = 1797.87$  (Dakar). Bottom row, scaling collapse for SIR model.  $R^2$  values for best-fit lines are, from left to right, .974 and .937. Best-fit line parameters are  $a = -0.17, b = 1802.79$  (NYC) and  $a = -0.04, b = 1760.42$  (Dakar).

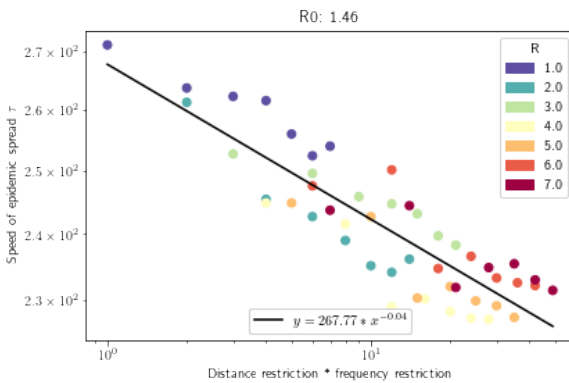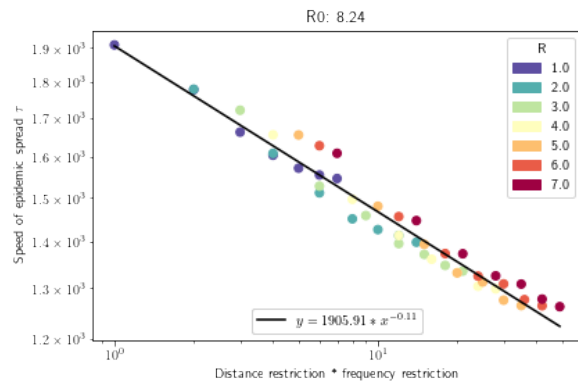

**Figure S2. Epidemics sizes for NYC covid outbreak with lower  $R_0 = 1.46$  (similar to the H1N1 epidemic) and higher  $R_0 = 8.2$  (similar to the upper estimates of COVID-19 Delta variant contagion), suggesting the scaling collapse is robust.  $R^2$  of best-fit lines are .925 and .9625, respectively.**

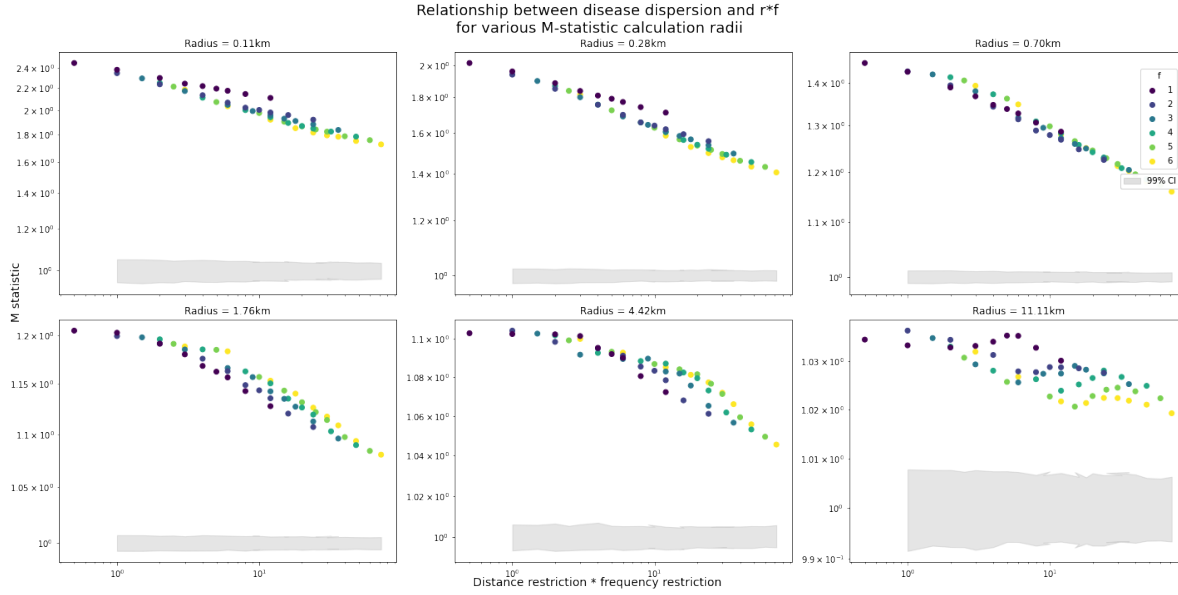

**Figure S3. Collapse of spatial dispersion of infections for various  $k$ .** Spatial dispersion  $M(k)$  shows a scaling relationship with  $r \cdot f$  regardless of  $k$ . 99% confidence bands are shown in gray, indicating that the spatial clustering in infections remains significant across values of  $r \cdot f$ .

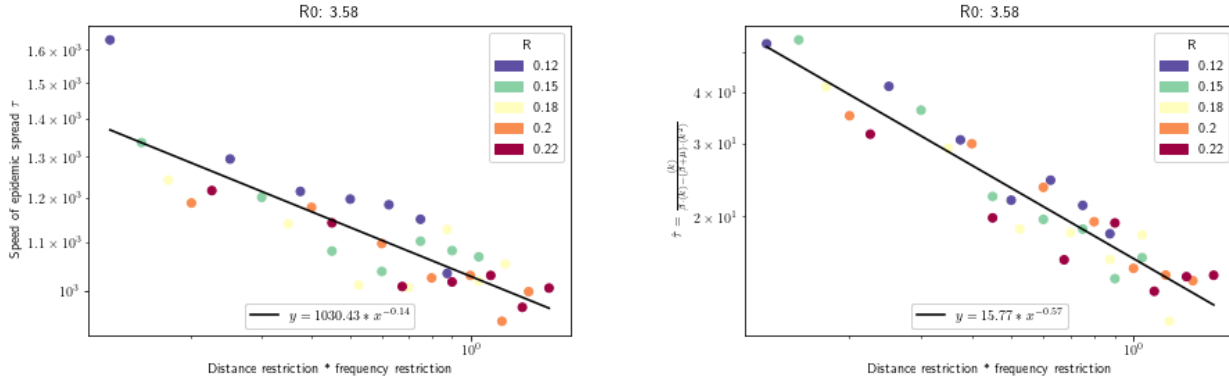

**(a)** Relationship between distance restriction and  $\tau$  in PEPR simulations.

**(b)** Relationship between distance restriction and  $\hat{\tau}$  as predicted by  $\langle k \rangle$ ,  $\langle k^2 \rangle$  in PEPR simulations.

**Figure S4. PEPR simulation results, where  $P_{\text{travel}} = .40$ .** When we run SEIR models across a set of trajectories  $M_{\text{sim}}$  which have been created using the PEPR model with  $P_{\text{travel}} = .40$ , we see a similar relationship between  $r \cdot f$  and  $\tau$  to that in our real trajectories  $M_{\text{real}}$ .
